# Supplementary material
Source: PubMed Central journal article supplement (PMC1502533)

**A**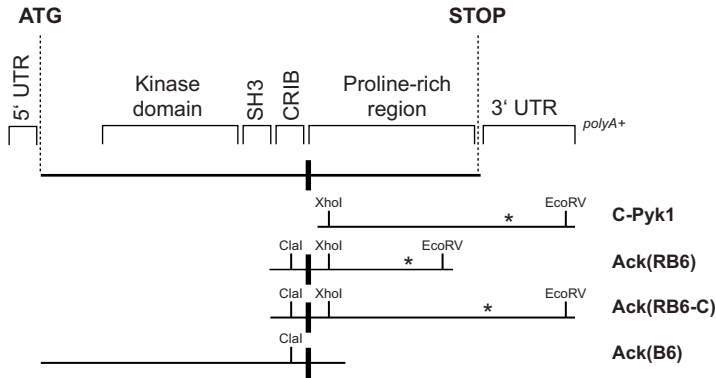

**B**

|        |                    |                     |                   |                   |                    |                   |           |      |
|--------|--------------------|---------------------|-------------------|-------------------|--------------------|-------------------|-----------|------|
| h-Ack* | <b>MGSRAQKSAG</b>  | <b>NAELWEPLPE</b>   | <b>GRPRPAGTSS</b> | <b>AVSAWASLKL</b> | <b>CLRGGSGRRQ</b>  | <b>RLGGGR</b>     | MQPE      | 60   |
| h-Ack  | ~~~~~              | ~~~~~               | ~~~~~             | ~~~~~             | ~~~~~              | ~~~~~             | MQPE      | 4    |
| m-Ack  | ~~~~~              | ~~~~~               | ~~~~~             | ~~~~~             | ~~~~~              | ~~~~~             | MQPE      | 4    |
| h-Ack* | <b>EGHRLAAGAA</b>  | <b>VRGAAATVLL</b>   | RLRDDLNVTR        | LSHFHEYVKNE       | DLEKIGMGRP         | GQRRRLWEAVK       |           | 120  |
| h-Ack  | EGTGWLLELL         | SEVQLQQYFL          | RLRDDLNVTR        | LSHFHEYVKNE       | DLEKIGMGRP         | GQRRRLWEAVK       |           | 64   |
| m-Ack  | EGTGWLLELL         | SEVQLQQYFL          | RLRDDLNVTR        | LSHFHEYVKNE       | DLEKIGMGRP         | GQRRRLWEAVK       |           | 64   |
| h-Ack* | RRKALCKRKS         | WMSKVFSGKR          | LEAEFPPHHS        | QSTFRKTS PA       | PGGPAGEG PL        | QSLTCLIGEK        |           | 180  |
| h-Ack  | RRKALCKRKS         | WMSKVFSGKR          | LEAEFPPHHS        | QSTFRKTS PA       | PGGPAGEG PL        | QSLTCLIGEK        |           | 124  |
| m-Ack  | RRKAMCKRKS         | WMSKVFSGKR          | LEAEFPPHHS        | QSTFRKTS PA       | PGGPAGEG PL        | QSLTCLIGEK        |           | 124  |
| h-Ack* | DLRRLLEKLG D       | G S F G V V R R G E | WDAPSGKTVS        | VAVKCLKPDV        | LSQPEAMDDF         | IREVNAMHSL        |           | 240  |
| h-Ack  | DLRRLLEKLG D       | G S F G V V R R G E | WDAPSGKTVS        | VAVKCLKPDV        | LSQPEAMDDF         | IREVNAMHSL        |           | 184  |
| m-Ack  | DLRRLLEKLG D       | G S F G V V R R G E | WDAPAGKTVS        | VAVKCLKPDV        | LSQPEAMDDF         | IREVNAMHSL        |           | 184  |
| h-Ack* | DHRNLIIRLYG        | VVLTPPMKMV          | TELA PLGSL L      | DRLRKHQGHF        | LLGTL SRYAV        | QVAEGMGYLE        |           | 300  |
| h-Ack  | DHRNLIIRLYG        | VVLTPPMKMV          | TELA PLGSL L      | DRLRKHQGHF        | LLGTL SRYAV        | QVAEGMGYLE        |           | 244  |
| m-Ack  | DHRNLIIRLYG        | VVLTLPMKMV          | TELA PLGSL L      | DRLRKHQGHF        | LLGTL SRYAV        | QVAEGMAYLE        |           | 244  |
| h-Ack* | SKRFIHRDLA         | ARNLLLATRD          | LVKIGDFGLM        | RALPQND DHY       | VMQEHKRVPF         | AWCAPESLKT        |           | 360  |
| h-Ack  | SKRFIHRDLA         | ARNLLLATRD          | LVKIGDFGLM        | RALPQND DHY       | VMQEHKRVPF         | AWCAPESLKT        |           | 304  |
| m-Ack  | SKRFIHRDLA         | ARNLLLATRD          | LVKIGDFGLM        | RALPQND DHY       | VMQEHKRVPF         | AWCAPESLKT        |           | 304  |
| h-Ack* | RTFSHASDTW         | MFGVTLWEMF          | TYGQEPWIGL        | NGSQILHKID        | KEGERLPRPE         | DCPQDIYNVM        |           | 420  |
| h-Ack  | RTFSHASDTW         | MFGVTLWEMF          | TYGQEPWIGL        | NGSQILHKID        | KEGERLPRPE         | DCPQDIYNVM        |           | 364  |
| m-Ack  | RTFSHASDTW         | MFGVTLWEMF          | TYGQEPWIGL        | NGSQILHKID        | KEGERLPRPE         | DCPQDIYNVM        |           | 364  |
| h-Ack* | VQCWAHKPED         | RPTFVALRDF          | LLEAQPTDMR        | ALQDFEEDPK        | LHIQMNDVIT         | VIEGRAENYV        |           | 480  |
| h-Ack  | VQCWAHKPED         | RPTFVALRDF          | LLEAQPTDMR        | ALQDFEEDPK        | LHIQMNDVIT         | VIEGRAENYV        |           | 424  |
| m-Ack  | VQCWAHKPED         | RPTFVALRDF          | LLEAQPTDMR        | ALQDFEEDPK        | LHIQMNDVIT         | VIEGRAENYV        |           | 424  |
| h-Ack* | WRGQNTRTL C        | VGPFPRNVVT          | SVAGLSAQDI        | SQPLQNSFIH        | TGHGDS DPRH        | CWGF PDRIDE       |           | 540  |
| h-Ack  | WRGQNTRTL C        | VGPFPRNVVT          | SVAGLSAQDI        | SQPLQNSFIH        | TGHGDS DPRH        | CWGF PDRIDE       |           | 484  |
| m-Ack  | WRGQNTRTL C        | VGPFPRNVVT          | SVAGLSAQDI        | SQPLQNSFIH        | TGHGDS DPRH        | CWGF PDRIDE       |           | 484  |
| h-Ack* | LYLGNPMDPP         | DLLSVELSTS          | RPPQHLGGVK        | .....             | .....              | KPTYD             | PVSEDDPLS | 585  |
| h-Ack  | LYLGNPMDPP         | DLLSVELSTS          | RPPQHLGGVK        | .....             | .....              | KPTYD             | PVSEDDPLS | 529  |
| m-Ack  | LYLGNPMDPP         | DLLSVELSTS          | RPTQHLGRVK        | <b>REPPRPPQP</b>  | <b>AIFTQ</b>       | KPTYD             | PVSEDDPLS | 544  |
| h-Ack* | SDFKRLGLRK         | PGLPRGLWLA          | KPSARVPGTK        | ASRSGAEVT         | LIDFGEEP VV        | <b>P...PYGPAA</b> |           | 642  |
| h-Ack  | SDFKRLGLRK         | PGLPRGLWLA          | KPSARVPGTK        | ASRSGAEVT         | LIDFGEEP VV        | PALRPPPSL         |           | 589  |
| m-Ack  | SDFKRLGLRK         | PALPRGLWLA          | KPSARVPGTE        | ADRSSGGEVT        | LIDFGEEP VV        | PTRPCAPSL         |           | 604  |
| h-Ack  | <b>LPGAAGHGR L</b> | <b>LPAGRDPASE</b>   | <b>PHAGTARPLH</b> | PTPVVDWDAR        | PLPPPPAYDD         | VAQDEDDFEI        |           | 702  |
| h-Ack* | AQLAMDACSL         | L...DETPPQS         | PTRALPRPLH        | PTPVVDWDAR        | PLPPPPAYDD         | VAQDEDDFEI        |           | 647  |
| m-Ack  | AQLAMDACSL         | L...DKTPPQS         | PTRALPRPLH        | PTPVVDWDAR        | PLPPPPAYDD         | VAQDEDDFEV        |           | 662  |
| h-Ack* | CSINSTLVGA         | GVPAGPSQGQ          | TNYAFVPEQA        | RPPPPLEDNL        | FLPPQGGGK P        | PSSAQTAEIF        |           | 762  |
| h-Ack  | CSINSTLVGA         | GVPAGPSQGQ          | TNYAFVPEQA        | RPPPPLEDNL        | FLPPQGGGK P        | PSSAQTAEIF        |           | 707  |
| m-Ack  | CSINSTLVGA         | GLPAGPSQGE          | TNYAFVPEQA        | QMPPALEDNL        | FLPPQGGGK P        | PSSVQTAEIF        |           | 722  |
| h-Ack* | QALQQECMRQ         | LQAP.GSPAP          | SFSPGGD DDKP      | QVPPRVPIPP        | RPTRPHVQLS         | PAPPGEETS         |           | 821  |
| h-Ack  | QALQQECMRQ         | LQAP.GSPAP          | SFSPGGD DDKP      | QVPPRVPIPP        | RPTRPHVQLS         | PAPPGEETS         |           | 766  |
| m-Ack  | QALQQECMRQ         | LQVPTGQLTP          | SPTPGGD DDKP      | QVPPRVPIPP        | RPTRPRVELS         | PAPSGEETS         |           | 782  |
| h-Ack* | QWPGPASPPR         | VPPREPLSPQ          | GSRTPSPLVP        | PGSSPLPPRL        | SSSPGKTMPT         | TQSFASDPKY        |           | 881  |
| h-Ack  | QWPGPASPPR         | VPPREPLSPQ          | GSRTPSPLVP        | PGSSPLPPRL        | SSSPGKTMPT         | TQSFASDPKY        |           | 826  |
| m-Ack  | RWPGPASPPR         | VPPREPLSPQ          | GSRTPSPLVP        | PGSSPLPHRL        | SSSPGKTMPT         | TQSFASDPKY        |           | 842  |
| h-Ack* | ATPQVIQAPG         | .AGGPCILPI          | VRDGKKVSS T       | HYLLPERPS         | YLERYQRFLR         | EAQSPPEPTP        |           | 940  |
| h-Ack  | ATPQVIQAPG         | .AGGPCILPI          | VRDGKKVSS T       | HYLLPERPS         | YLERYQRFLR         | EAQSPPEPTP        |           | 885  |
| m-Ack  | ATPQVIQAPG         | PRAGPCILPI          | VRDGRKVVSS T      | HYLLPERPP         | YLERYQRFLR         | EAQSPPEPAA        |           | 902  |
| h-Ack* | LPVPLLLPPP         | STPAPAAPTA          | TVRPMQAAL         | DPKANFSTNN        | SNPGARPPP          | RATARLPQRG        |           | 1000 |
| h-Ack  | LPVPLLLPPP         | STPAPAAPTA          | TVRPMQAAL         | DPKANFSTNN        | SNPGARPPP          | RATARLPQRG        |           | 945  |
| m-Ack  | LPVPLLLPPP         | STPAPAAPTA          | TVRPMQAAP         | DPKANFSTNN        | SNPGARPPSL         | RAAARLPQRG        |           | 962  |
| h-Ack* | CPGDGPEAGR         | PADKIQM..A          | MVHGVTTEEC        | QAALQCHGWS        | VQRA <b>CPVSEG</b> | <b>GAALRAGSAA</b> |           | 1058 |
| h-Ack  | CPGDGPEAGR         | PADKIQM..A          | MVHGVTTEEC        | QAALQCHGWS        | VQRAAQYLKV         | EQLFGLGLRP        |           | 1003 |
| m-Ack  | CPGDGQEAA R        | PADKVQMLQA          | MVHGVTTEEC        | QAALQSHSWS        | VQRAAQYLKV         | EQLFGLGLRP        |           | 1022 |
| h-Ack* | <b>QRECHKVLEM</b>  | FDWNLEQAGC          | HLLGSWGPAH        | HKR               | 1091               |                   |           |      |
| h-Ack  | RGECHKVLEM         | FDWNLEQAGC          | HLLGSWGPAH        | HKR               | 1036               |                   |           |      |
| m-Ack  | RVECHKVLEM         | FDWNLEQAGC          | HLLGSCGPAH        | HKR               | 1055               |                   |           |      |

PTK

CRIB SH3

RHR

**C**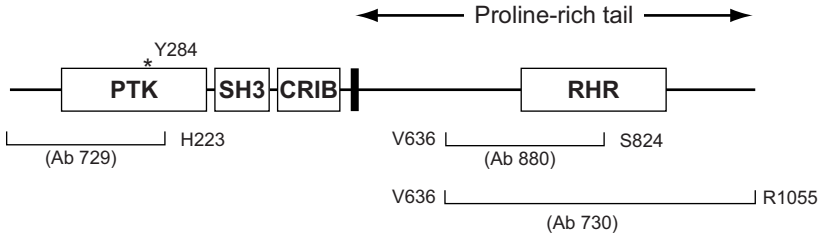

Supplement: pnas_0603714103_1.pdf [file pnas_0603714103_1.pdf]
