# Supplementary material
Source: PubMed Central journal article supplement (PMC1502533)

**B**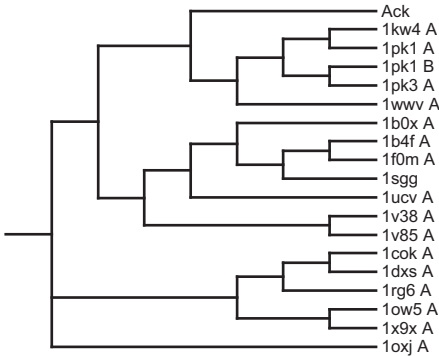

Supplement: pnas_0603714103_2.pdf [file pnas_0603714103_2.pdf]
